# Supplementary material
Source: Research Square preprint supplement (doi:10.21203/rs.3.rs-9511705/v1)
Supplement: Supplementary file 1 [file 41ae10abf81bfab2b98c0267.docx]

**A fucoidan SFAP-5 from *Sargassum fusiforme* antagonized the T-cell proliferation-inhibition induced by cancer-associated fibroblasts**

Ruian Ma a,b,1, Jing Ma c,1, Xilian Chen b, Mingyue Wang b, Kangyun Zhang b, Jie Gao b, Juan Du a*,e, Ning Tao d*, Caixia Dong b*

*a**Department of Pharmacognosy, College of Pharmacy, Jiamusi University, Jiamusi 154007, China;*

*b Tianjin Key Laboratory on Technologies Enabling Development of Clinical Therapeutics and Diagnosis, School of Pharmacy, Tianjin Medical University, Tianjin 300070, China;*

*cDepartment of Pathology, The affiliated Hospital, Southwest Medical University;* *Department of Urology, The affiliated Hospital, Southwest Medical University, Luzhou 646000, China;*

*d**Key Laboratory of Epigenetic Regulation and Intervention, Institute of Biophysics, Chinese Academy of Sciences, Beijing 100101, China；*

*eDepartment of Pharmacy, Zhangzhou Health Vocational College, Zhangzhou 363000, Fujian Province, China*

1, These authors contributed equally to the manuscript.

*,These authors contributed equally to this work.

Corresponding authors, Caixia Dong, E-mail: [dongcaixia@tmu.edu.cn](mailto:dongcaixia@tmu.edu.cn) (C.X. Dong); Ning Tao, E-mail: [tao@ibp.ac.cn (N. Tao);](mailto:tao@ibp.ac.cn;) Juan Du, E-mail: jmsdujuan@126.com (J. Du).

**Supplementary material**

**6**

**Fig. S1** The full uncropped Gels and Blots image(s)
